# Supplementary material
Source: ML conference proceedings conference paper supplement (https://openaccess.thecvf.com/content/cvpr_2017/html/Hussain_Automatic_Understanding_of_2017_CVPR_paper.html)
Supplement: Supplementary file 1 [file Hussain_Automatic_Understanding_of_2017_CVPR_supplemental.pdf]

# Automatic Understanding of Image and Video Advertisements (Supplementary File)

Zaeem Hussain      Mingda Zhang      Xiaozhong Zhang      Keren Ye  
Christopher Thomas      Zuha Agha      Nathan Ong      Adriana Kovashka  
Department of Computer Science  
University of Pittsburgh

{zaeem, mzhang, xiaozhong, yekeren, chris, zua2, nro5, kovashka}@cs.pitt.edu

In this document, we include more information and statistics about our collected data, for both the image and video datasets. We also include additional experimental results and method explanations (from Sec. 15 onward).

## 1. Keywords used for image search

We compiled the following list of keywords, and used it to search for image advertisements. Each query string contained a keyword from this list followed by either the word ‘ads’ or ‘advertisements’.

– Food:

- Restaurants

McDonald’s, Burger King, KFC, Wendy’s, Five Guys Famous Burgers and Fries, Whataburger, In-N-Out Burger, Carl’s Jr., Hardee’s, Jack-in-the-Box, White Castle, Arby’s, Chick-fil-A, Popeyes Chicken & Biscuits, Dunkin’ Donuts, Krispy Kreme, Tim Hortons, Qdoba, Chipotle, Baja Fresh, Taco Bell, El Pollo Loco, Bruegger’s Bagels, Panera Bread, Au Bon Pan, Cinnabon, Auntie Anne’s, Quizno’s Classic Subs, Subway, Jimmy John’s, Pizza Hut, Dominos, Papa John’s, Little Caesars, Boston Market, Sonic Drive-In, Long John Silver’s, Sbarro, Panda Express, Applebee’s

- Ice cream

Dairy Queen, Baskin-Robin’s, TCBY, Ben & Jerry’s, Cold Stone Creamery, Blue Bell, Haagen-Dazs, Breyers, Klondike, Drumstick, Skinny Cow

- Chocolate

3 Musketeers, 100 Grand Bar, Aero, Almond Joy, Baby Ruth, Butterfinger, Clark Bar, Nestle Crunch, Dove Bar, Heath bar, Hershey bar, KitKat, Krackel, Lindor, Mars Bar, Milky Way, Oh Henry!, PayDay, Reese’s Peanut Butter Cup, Rolo, York Peppermint Pattie, Sky Bar, Snickers, Take 5, Toblerone, Twix, Whatchamacallit, Wonka Bar, Mars, Hershey, Cadbury, Nestle, Necco

- Cookies

Chips Ahoy!, Girl Scout Cookies, Pepperidge Farms, Oreo, Nilla, Nabisco, Keebler, Wheat Thins, Triscuits, Saltines

- Chips

Lays, Pringles, Doritos, Cheetos, Tostitos

- Gum

Wrigley, Fruit Stripe, Bubble Yum, Juicy Fruit, Chiclets, Trident, Bazooka

- Nuts

Planters, Wonderful Pistachios, Emerald

- Condiments

ketchup, mustard, Heinz, mayonnaise

– Drinks:

- Soda

Coca Cola, Pepsi, Mountain Dew, A&W, Mug Root Beer, Crush, Fanta, Sprite, 7-Up, Canada Dry, RC Cola

- Alcohol
  - vodka, Absolut, whiskey, wine, beer, Coors Lite, Miller Lite, BRB
- Water
  - Aquafina, Evian, Perrier, Dasani, Nestle Waters, Deer Park Natural Spring Water
- Coffee
  - Eight O’Clock, Starbucks, Maxwell House, Folgers, Keurig
- Energy drinks
  - Monster, Red Bull, Four Loko, Five-Hour Energy
- Juice
  - Minute Maid, Florida’s Natural, Sunny D, Capri Sun
- Chocolate drinks
  - Milo, Ovaltine, Nesquik
- Cars:
  - Nissan, Kia, Audi, Subaru, Honda, Chevrolet, Porsche, Toyota, Ford, Rolls Royce, Mitsubishi, Hyundai, Oldsmobile, Jaguar, Volvo, Mercedes Benz, General Motors, Mazda, BMW, Volkswagen, Hummer, Tesla, Lincoln, Jeep, Land Rover
- Electronics:
  - Phones
    - Samsung, LG, iPhone, Motorola, Ericsson, Pantech, Nokia, Google Nexus, BlackBerry, HTC, Siemens, Palm Pilot, Alcatel
  - Service providers
    - Comcast, Dish, DirecTV, Google Fiber, Time Warner Cable, Verizon, T-mobile, Sprint, Cingular, AT&T, Nextel, Bell South, Pacific Bell, Virgin Mobile, Boost Mobile, Cricket Wireless
  - Computers
    - Dell, HP, Acer, Asus, Lenovo, Sony VAIO, Packard-Bell, Gateway, IBM, Apple, Compaq, Wang Laboratories, Microsoft
  - Televisions
    - Sony, LG, Panasonic, Sanyo, Itachi, Samsung, RCA, Vizio, Toshiba, Sharp, Magnavox, Westinghouse, JVC, General Electric
- Financial institutions:
  - Insurance
    - Nationwide, Farmer’s, Northwestern Mutual, Prudential Insurance Company of America, Progressive Insurance, E-surance, MetLife, Highmark, AETNA, United American Insurance Company, UnitedHealthcare, Delta Dental, Allstate, GEICO, Wells Fargo
  - Banks
    - CITibank, Bank of America, Wells Fargo, Capital One, First Niagara, PNC Bank, BNY Mellon, HSBC, USAA
- Travel:
  - Airlines
    - United, American, Delta, Frontier, Southwest, Spirit, Etihad, Emirates, Singapore, Thai, Qatar, Turkish
  - Vacation, toursim, resort, cruise, car rentals, train
- Sports:
  - Equipment
    - football, soccer, baseball, golf, basketball, hockey, ski, surfing, watersports, sailing, snowboard, ice skating, gymnastics, bowling, curling, volleyball, tennis, squash, swimming, diving, cross country, cross country skiing, cricket, marathon, triathlon, rowing, kayaking, fencing, martial arts, ping pong/table tennis, badminton, equestrian, polo, water polo, shooting, archery, cycling, speed skating, track and field
- Cosmetics:
  - Estee Lauder, Maybelline, Cover Girl, L’Oreal, Neutrogena, Oil of Olay, Physician’s Formula, Avon, Burt’s Bees, Lancome, Chanel, Clinique, Almay, Benefit, Nars, Urban Decay, Dior, Iman, Dermablend, ShiSeido, Revlon, Max Factor, Kiehl’s, Armani, Laura Mercier, Bobbi Brown, Clarins, Givenchy, Sephora, Elizabeth Arden, The Body Shop, Mac, Origins, Nivea, Smashbox, Bareminerals, Stila
- Clothing:

Levi's, Lucky, Madewell, J. Crew, Gap, American Eagle, Bebe, Loft, Ann Taylor, Tommy Hilfiger, Ralph Lauren, The Limited, LaCoste, True Religion, Kate Spade, Tory Birch, BCBG, Land's End, LL. Bean, Talbots, Lane Bryant, Calvin Klein, Anne Klein, Nike, Reebok, Under Armor, Children's Palace, Gymboree, Carter's, Coach(they have clothing), Burberry, Guess, Wrangler, Vera Wang, Lee, Adidas, Zara, Uniqlo, Columbia Sportswear, North Face, Converse, New Balance, Eddie Bauer, Van Heusen, Fubu, Kenneth Cole, Ecko, Swatch, Prada, Speedo, Versace, Hugo Boss, Gucci, Chanel, Gloria Vanderbilt, Izod, Fruit of the Loom, Hanes, Jockey, Puma, Abercrombie and Fitch, Old Navy, H and M, Urban Outfitters, Converse, Armani, Brooks Brothers, J.S. Bank Clothiers, Sean John, Victoria's Secret, DKNY, Aerostaple, Liz Claiborne, Arizona, Hollister, Diesel, Timberland, Jessica Simpson, Banana Republic, Fila, Petite Sophisticates, Cache, Delia's, Esprit, Club Monaco, Burton, Osh Kosh Bgosh, Lululemon, Athleta, Eileen Fisher, Maidenform, Eileen West, Bally's

– Public service announcements (PSA's):

- Environment, nature, animal rights, PETA
- Domestic violence, human rights
- Safe driving, safety
- Self-esteem, bullying, cyberbullying
- Smoking, healthcare

## 2. Examples of advertisement and non-advertisement images

Here are the instructions that were given to MTurkers for selecting whether an image was an advertisement or not.

- In this task, you will answer the question: "Is this image an advertisement? You should answer yes if you think this image could appear in print media as an advertisement WITHOUT any changes or additions to the image."
- The image can be an advertisement if it is advertising a commercial product/service or if it is conveying a public service message. To answer yes, the image must be a self contained advertisement. In other words, the image should contain a direct or implied persuasive message in visual or text form. Hence, in this task, 'stills' from video commercials, images that may be cropped from advertisements, personal photographs (for personal ads or otherwise), and pictures of products with no accompanying advertisement flair, are not considered advertisements. For example, a well-photographed picture of a car without any accompanying visual or textual message for persuading a reader to buy that car should be given the answer "no."
- If the image is too small or blurry for you to make out what the content of the image is, select "no." Do not select "no" solely on the basis that the text of the advertisement is unreadable.
- For most of the images in this question, the correct answer should be obvious. There is no need to attempt to infer whether or not a given image could be a part of an advertisement; it either is or is not an advertisement.

Fig. 1 shows some images, from the pool of noisy images collected, which were shown as examples to MTurk workers for completing the above task. Fig. 2 shows examples of ad/not ad annotations by the workers.

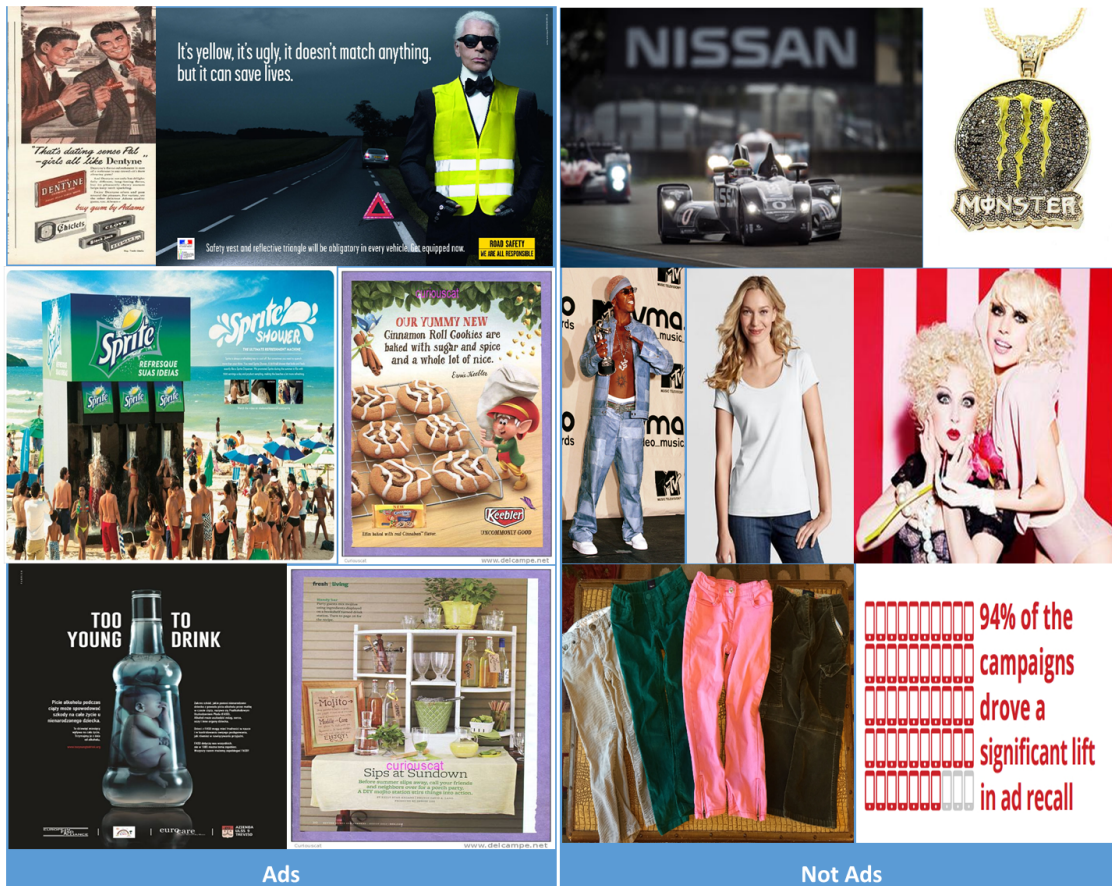

Figure 1. Some of the examples of 'ads' and 'not ads' shown to MTurkers.





### 3. Topics of advertisement images

Below is the complete list of the topics of advertisements which MTurkers were asked to choose from, for each ad image. They were also given a final 'Other' option in which they were asked to write the topic of the ad, if it was not already present in the provided list.

- Restaurants, cafe, fast food
- Chocolate, cookies, candy, ice cream
- Chips, snacks, nuts, fruit, gum, cereal, yogurt, soups
- Seasoning, condiments, ketchup
- Pet food
- Alcohol
- Coffee, tea
- Soda, juice, milk, energy drinks, water
- Cars, automobiles (car sales, auto parts, car insurance, car repair, gas, motor oil, etc.)
- Electronics (computers, laptops, tablets, cellphones, TVs, etc.)
- Phone, TV and internet service providers
- Financial services (banks, credit cards, investment firms, etc.)
- Education (universities, colleges, kindergarten, online degrees, etc.)
- Security and safety services (anti-theft, safety courses, etc.)
- Software (internet radio, streaming, job search website, grammar correction, travel planning, etc.)
- Other services (dating, tax, legal, loan, religious, printing, catering, etc.)
- Beauty products and cosmetics (deodorants, toothpaste, makeup, hair products, laser hair removal, etc.)
- Healthcare and medications (hospitals, health insurance, allergy, cold remedy, home tests, vitamins)
- Clothing and accessories (jeans, shoes, eye glasses, handbags, watches, jewelry)
- Baby products (baby food, sippy cups, diapers, etc.)
- Games and toys (including video and mobile games)
- Cleaning products (detergents, fabric softeners, soap, tissues, paper towels, etc.)
- Home improvements and repairs (furniture, decoration, lawn care, plumbing, etc.)
- Home appliances (coffee makers, dishwashers, cookware, vacuum cleaners, heaters, music players, etc.)
- Vacation and travel (airlines, cruises, theme parks, hotels, travel agents, etc.)
- Media and arts (TV shows, movies, musicals, books, audio books, etc.)
- Sports equipment and activities
- Shopping (department stores, drug stores, groceries, etc.)
- Gambling (lotteries, casinos, etc.)
- Environment, nature, pollution, wildlife
- Animal rights, animal abuse
- Human rights
- Safety, safe driving, fire safety
- Smoking, alcohol abuse
- Domestic violence
- Self esteem, bullying, cyber bullying
- Political candidates (support or opposition)
- Charities
- Unclear
- Other:

We got a total of 64,340 images annotated. Out of those, 5,660 images were annotated by 5 different workers, while the rest were annotated by 3 workers each. The final topic for an image was chosen by taking the majority label out of 3 (or 5) votes. In case of ties, which occurred in 7.4% images, a topic was chosen randomly from the available votes. We computed the agreement with the majority vote for each image, by dividing the number of majority vote annotations by the total number of annotations for each image. The average of this over the 64,340 images was 85.2%.

Fig. 3 shows the distribution of topics. We see that most common are clothing ads, automobile ads, and beauty ads.

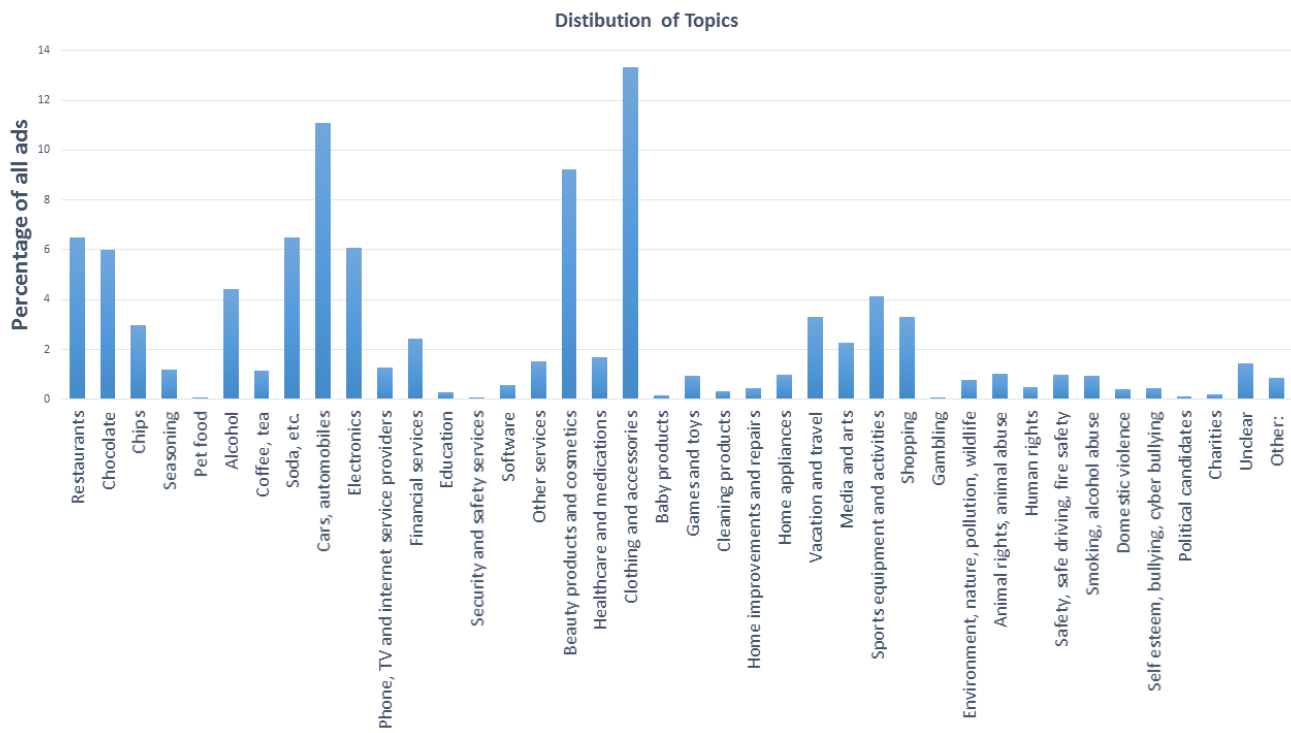

Figure 3. Frequency of each topic as a fraction of all ads.

#### 4. Sentiments of advertisement images

Below is the complete list of the sentiments of advertisements which MTurkers were asked to choose from, for each ad image. MTurkers were allowed to select multiple sentiments for a single image.

- **Active** (energetic, adventurous, vibrant, enthusiastic, playful)
- **Afraid** (horrified, scared, fearful)
- **Alarmed** (concerned, worried, anxious, overwhelmed)
- **Alert** (attentive, curious)
- **Amazed** (surprised, astonished, awed, fascinated, intrigued)
- **Amused** (humored, laughing)
- **Angry** (annoyed, irritated)
- **Calm** (soothed, peaceful, comforted, fulfilled, cozy)
- **Cheerful** (delighted, happy, joyful, carefree, optimistic)
- **Confident** (assured, strong, healthy)
- **Conscious** (aware, thoughtful, prepared)
- **Creative** (inventive, productive)
- **Disturbed** (disgusted, shocked)
- **Eager** (hungry, thirsty, passionate)
- **Educated** (informed, enlightened, smart, savvy, intelligent)
- **Emotional** (vulnerable, moved, nostalgic, reminiscent)
- **Empathetic** (sympathetic, supportive, understanding, receptive)
- **Fashionable** (trendy, elegant, beautiful, attractive, sexy)
- **Feminine** (womanly, girlish)
- **Grateful** (thankful)
- **Inspired** (motivated, ambitious, empowered, hopeful, determined)
- **Jealous**
- **Loving** (loved, romantic)
- **Manly**
- **Persuaded** (impressed, enchanted, immersed)
- **Pessimistic** (skeptical)
- **Proud** (patriotic)
- **Sad** (depressed, upset, betrayed, distant)
- **Thrifty** (frugal)
- **Youthful** (childlike)

We got a total of 30,340 images annotated, out of which 5,660 were annotated by 5 workers per image, while the rest were annotated by 3 workers each. For images that were annotated by 5 workers, any sentiment with at least 2 votes was considered, and for images which were annotated by 3 workers each, every vote for a sentiment was considered sufficient to indicate the presence of that sentiment in that ad.

Fig. 4 shows the distribution of some popular topics on the more common sentiments, based on 24,660 images. We see that beauty product ads evoke the fashionable and feminine sentiments, while cars, alcohol, and sports ads inspire manly sentiments. We also see that PSAs across the board inspire more of the following sentiments than commercial product ads: alarm, alertness, anger, consciousness, disturbance, feeling educated, emotion, empathy and sadness. The active sentiment is predominant in sports ads, environment ads inspire consciousness, while restaurant and alcohol ads inspire eagerness. Domestic abuse ads are most emotional and inspire the most sadness.

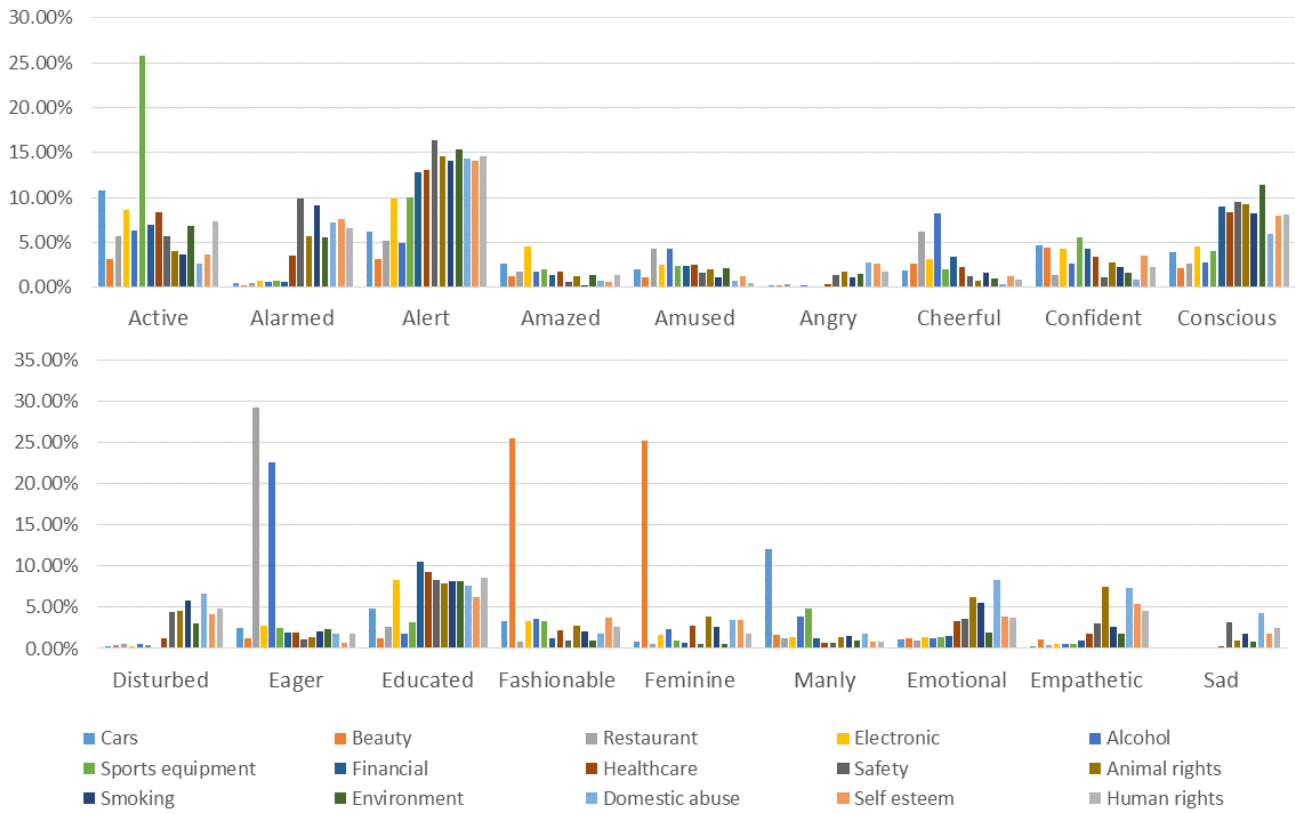

Figure 4. Distribution of several topics over common sentiments.



## 5. Question-answer examples for images

Fig. 5 shows the responses to the "What should you do, according to this ad?" and "Why, according to this ad, should you take this action?" questions.

|                                                                                    |                                                              |                                                                                    |                                                              |                                                                                     |                                                              |
|------------------------------------------------------------------------------------|--------------------------------------------------------------|------------------------------------------------------------------------------------|--------------------------------------------------------------|-------------------------------------------------------------------------------------|--------------------------------------------------------------|
|   |                                                              |  |                                                              |  |                                                              |
| <b>What should I do, according to this ad?</b>                                     | <b>Why, according to this ad, should I take this action?</b> | <b>What...</b>                                                                     | <b>Why...</b>                                                | <b>What...</b>                                                                      | <b>Why...</b>                                                |
| I should buy Banana Republic clothes.                                              | Because it will make me look fashionable.                    | I should buy absolut vodka.                                                        | Because it will make me a true New Yorker.                   | I should be careful what words I use on my kid                                      | Because words can hurt as much as fists                      |
|  |                                                              |  |                                                              |  |                                                              |
| <b>What should I do, according to this ad?</b>                                     | <b>Why, according to this ad, should I take this action?</b> | <b>What should I do, according to this ad?</b>                                     | <b>Why, according to this ad, should I take this action?</b> | <b>What should I do, according to this ad?</b>                                      | <b>Why, according to this ad, should I take this action?</b> |
| I should try this lipstick                                                         | Because it is better than the brand Mac                      | I should sign up for the Asus promo                                                | Because there are free gifts                                 | I should prevent verbal abuse                                                       | Because its as bad as physical abuse                         |

Figure 5. Some images with their questions and answers.

Tab. 1 shows the common words occurring in response to the "What should I do..." and "Why should I..." questions for 35 of the 38 topics. The common words for education, travel and smoking ads are shown in the main paper. We see that overall the words "buy," "want" and "go" are common. However, we also see some topic specific words such as "drink" and "refreshing" for beverages, "play" and "fun" for games and toys, "support" and "kids" for charities, etc.

|                   |           |                 |            |                   |           |                   |          |                      |             |
|-------------------|-----------|-----------------|------------|-------------------|-----------|-------------------|----------|----------------------|-------------|
| Restaurants, etc. |           | Chocolate, etc. |            | Chips, etc.       |           | Ketchup, etc.     |          | Pet food             |             |
| What?             | Why?      | What?           | Why?       | What?             | Why?      | What?             | Why?     | What?                | Why?        |
| eat               | good      | buy             | good       | buy               | good      | buy               | good     | cat                  | cat         |
| buy               | food      | eat             | delicious  | eat               | make      | heinz             | taste    | buy                  | good        |
| go                | can       | candy           | make       | gum               | like      | ketchup           | food     | food                 | like        |
| pizza             | delicious | chocolate       | like       | chips             | taste     | use               | make     | feed                 | dog         |
| burger            | get       | cream           | taste      | chew              | flavor    | eat               | like     | friskies             | want        |
| Coffee, tea       |           | Soda, etc       |            | Cars              |           | Electronics       |          | Phone, TV, etc.      |             |
| What?             | Why?      | What?           | Why?       | What?             | Why?      | What?             | Why?     | What?                | Why?        |
| coffee            | coffee    | drink           | good       | buy               | car       | buy               | good     | buy                  | get         |
| buy               | good      | buy             | make       | car               | good      | phone             | great    | use                  | free        |
| drink             | like      | water           | refreshing | drive             | like      | use               | make     | get                  | want        |
| starbucks         | make      | milk            | drink      | get               | great     | get               | like     | phone                | phone       |
| maxwell           | get       | pepsi           | like       | ford              | make      | computer          | want     | service              | good        |
| Security services |           | Software        |            | Beauty products   |           | Healthcare        |          | Clothing             |             |
| What?             | Why?      | What?           | Why?       | What?             | Why?      | What?             | Why?     | What?                | Why?        |
| buy               | want      | use             | help       | buy               | make      | buy               | help     | buy                  | make        |
| use               | fun       | buy             | want       | use               | look      | use               | make     | wear                 | look        |
| sign              | help      | ibm             | make       | makeup            | skin      | go                | want     | shop                 | sexy        |
| take              | dangerous | get             | ads        | wear              | beautiful | get               | good     | shoes                | like        |
| up                | employees | microsoft       | like       | perfume           | good      | health            | health   | clothes              | attractive  |
| Baby products     |           | Games and toys  |            | Cleaning products |           | Home improvements |          | Home appliances      |             |
| What?             | Why?      | What?           | Why?       | What?             | Why?      | What?             | Why?     | What?                | Why?        |
| buy               | baby      | buy             | fun        | buy               | clean     | buy               | make     | buy                  | make        |
| baby              | keep      | play            | game       | use               | make      | use               | look     | westinghouse         | good        |
| use               | healthy   | video           | like       | soap              | good      | shop              | good     | ge                   | better      |
| product           | best      | game            | play       | product           | stains    | paint             | home     | use                  | great       |
| formula           | help      | get             | looks      | detergent         | like      | company           | like     | refrigerator         | food        |
| Media and arts    |           | Sports          |            | Shopping          |           | Gambling          |          | Environment          |             |
| What?             | Why?      | What?           | Why?       | What?             | Why?      | What?             | Why?     | What?                | Why?        |
| watch             | like      | buy             | fun        | shop              | good      | play              | win      | use                  | environment |
| buy               | want      | go              | make       | buy               | sale      | go                | money    | buy                  | help        |
| go                | fun       | watch           | want       | go                | deals     | use               | fun      | environment          | good        |
| see               | good      | use             | good       | store             | prices    | want              | gambling | want                 | nature      |
| movie             | looks     | want            | like       | foods             | great     | casino            | take     | nature               | want        |
| Human rights      |           | Safety          |            | Domestic violence |           | Self esteem       |          | Political candidates |             |
| What?             | Why?      | What?           | Why?       | What?             | Why?      | What?             | Why?     | What?                | Why?        |
| support           | people    | drive           | dangerous  | domestic          | violence  | bullying          | people   | vote                 | help        |
| rights            | help      | drink           | safe       | violence          | help      | buy               | help     | support              | care        |
| human             | rights    | buy             | want       | abuse             | domestic  | use               | bullying | hillary              | people      |
| amnesty           | want      | use             | get        | against           | women     | go                | self     | clinton              | change      |
| want              | human     | wear            | save       | help              | want      | want              | want     | ad                   | against     |
| Alcohol           |           | Financial       |            | Animal Rights     |           | Other Services    |          | Charities            |             |
| What?             | Why?      | What?           | Why?       | What?             | Why?      | What?             | Why?     | What?                | Why?        |
| drink             | good      | use             | help       | fur               | animal    | use               | help     | buy                  | help        |
| buy               | make      | bank            | want       | animals           | want      | buy               | make     | donate               | support     |
| beer              | like      | get             | money      | wear              | fur       | insurance         | want     | cookies              | save        |
| vodka             | drink     | insurance       | make       | support           | help      | get               | good     | support              | kids        |
| absolut           | great     | buy             | get        | peta              | cruel     | go                | need     | want                 | good        |

Table 1. Common words in responses to “What should I do, according to the ad?” and “Why, according to the ad, should I do it?” questions for the image dataset.



## 6. Ads strategies

We submitted 4,000 ad images for annotation of strategies on MTurk. Each image was annotated by 5 workers, who could select multiple strategies for an image. We kept all strategies that got at least 2 out of 5 votes. Below we provide further description of each strategy. These descriptions were part of the instructions given to MTurkers to help them identify the strategies. Fig. 6 shows more examples of each strategy.

### **Understanding physical processes or direction**

This includes examples where there is an implicit process or motion which is assumed to be happening at the moment when the image is taken. Think about physical occurrences like gravity or forces, or properties of the 3D world (like being under/over/pointed at) which affect the world or participants in some ways (e.g. a car hitting a face deforms it, sharpness causes injury, eating causing parts of the food to disappear), etc.

### **Symbolism and physical allegories**

Ads contain limited space, so sometimes they require the viewer to make inferences outside of the content of the ad. For example, an ad might show a dove and assume the viewer will associate this dove with the concept of “peace”. Similarly, a lemon might symbolize freshness, or blood might symbolize injury/death. We refer to these mappings from a set of pixels to a non-visual concept as “symbols”. In this same category we also group what we refer to as “physical allegories”. By that we mean objects that are meant to look like other objects. Unlike “atypical objects”, these physical allegories say more that an object serves the role of another object, or is placed or arranged in the same way as another object, rather than saying that one object IS another object.

### **Atypical objects**

For example, a combination of pieces of trash in the form of a deer is made to look like a deer.

### **Contrast**

These ads juxtapose two objects and show that these objects have contrasting qualities, or show contrasting situations. For example, an ad might show two tree branches, one with and one without a bird on it, in an attempt to convince you to prevent animals from dying off.

### **Transfer of qualities**

These ads juxtapose two objects that are expected to have similar properties. For example, an ad that shows a lady drinking out of a tall and slim coke can is saying “If you drink this beverage, you will also become thin.” Similarly, a classy actor eating an ice-cream makes the ice-cream appear classy.

### **References to culture or celebrities**

These ads require that you are familiar with the meme or cultural reference that they are portraying. For example, an ad might expect you to know about the apple that Adam and Eve ate from, and that it symbolizes sin. Similarly, an ad might expect you to know what the hand gesture of devil’s horns symbolizes (it is often used in rock/metal culture). Alternatively, an ad might require that you know who a certain person is (a celebrity), since a celebrity advertising a product makes it seem attractive.

### **Surprise or humor**

These ads show a surprising twist compared to how you expect things to occur in the real world. For example, lungs might be filled with cigarette butts, or a grandmother might be riding a bicycle in dangerous fashion.

### **Human shown experiencing product**

Some ads attempt to excite the viewer about the product by showing a human experiencing the product, and implying that the product has qualities such as e.g. deliciousness.

### **Product qualities described in literal fashion (Straightforward)**

In this group are ads that do not appeal to allegories or symbolism, nor show atypical objects, require understanding of physical processes, or involve surprise, humor, or contrast (i.e. these are your typical not-so-creative ads). Many of these ads show the product in the center, as being attractive, beautiful, stylish, delicious, etc. In some of these, the qualities of the product are either obvious without any symbolism or allegory, or are described in text.

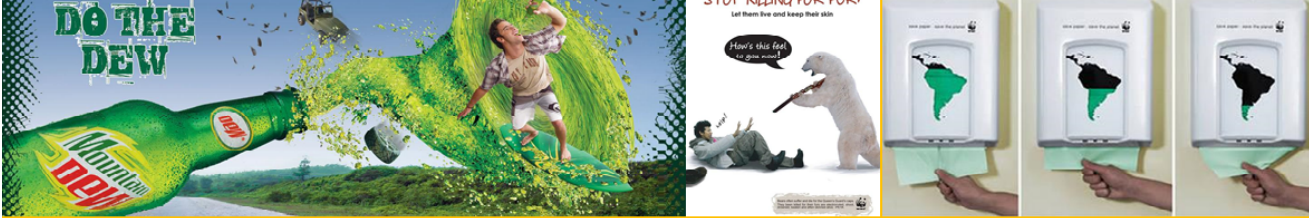

Understanding physical processes

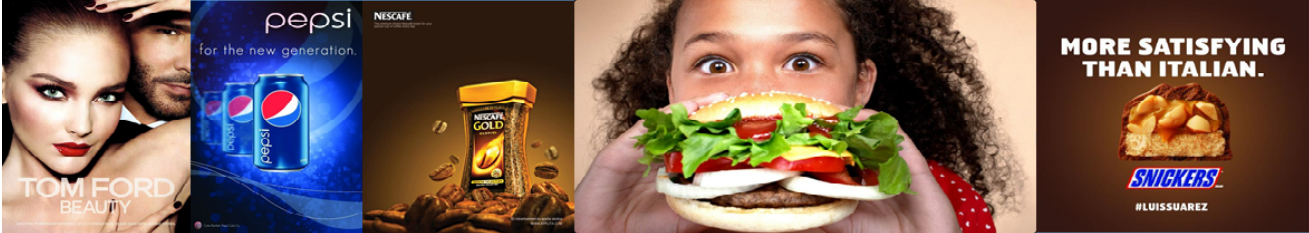

Straightforward/literal ads (from a vision standpoint), possibly OCR/NLP required

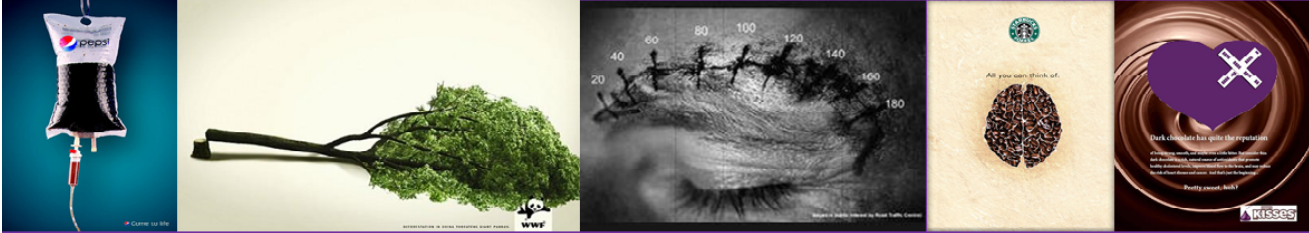

Symbolism

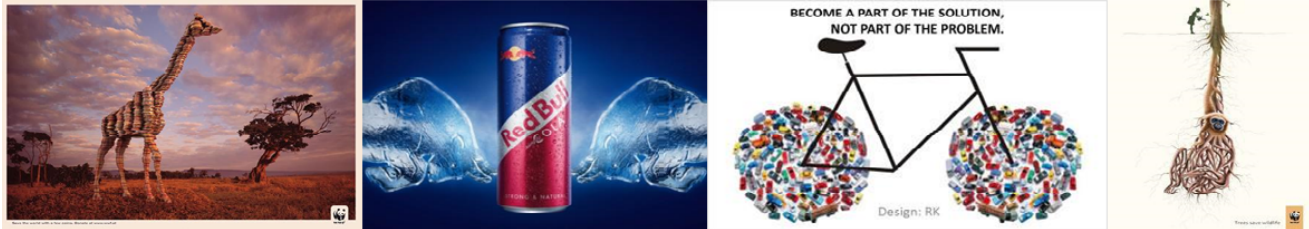

Atypical objects

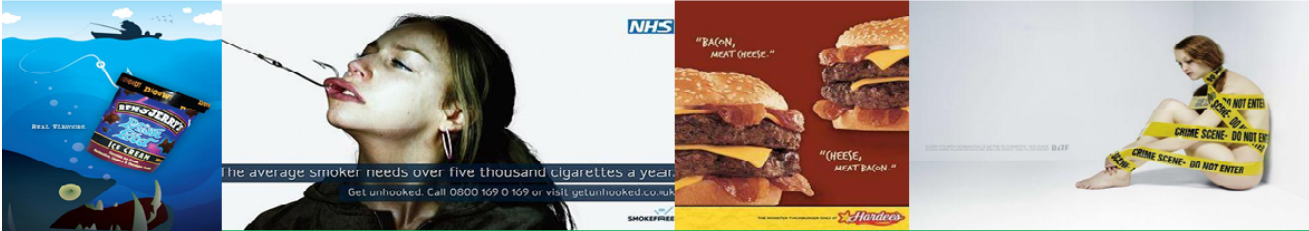

Surprise/shock or humor/pun

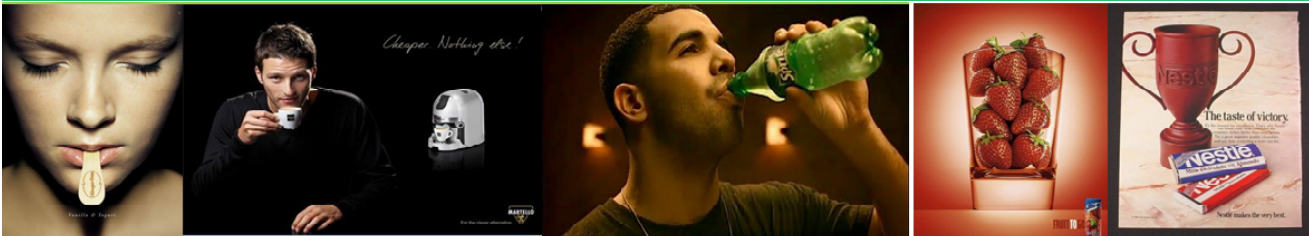

Humans experiencing product

Transfer of qualities

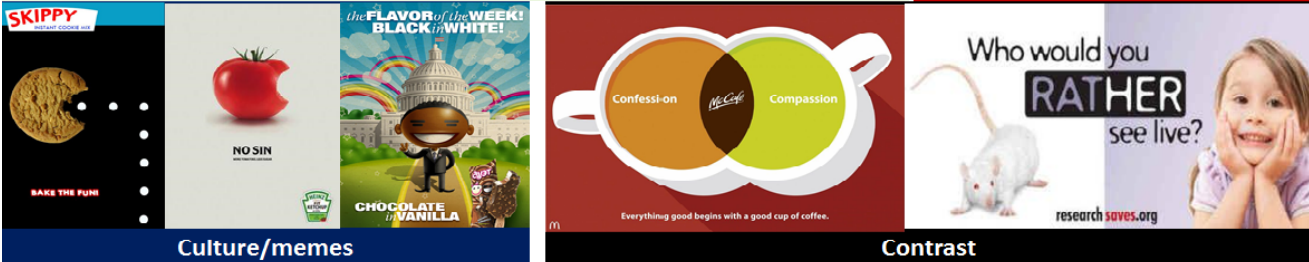

Culture/memes

Contrast

Figure 6. Examples of ads grouped by strategy or visual understanding required for decoding the ad.

## 7. List of symbols

Following is a list of the 221 most common symbols we obtained after pruning. The list is sorted based on the frequency of occurrence of these symbols in descending order, i.e. the more commonly occurring symbols appear earlier in the list.

danger, fun, nature, beauty, death, sex, health, natural, adventure, environment, power, sexy, food, love, violence, fresh, strength, energy, abuse, speed, safety, sports, travel, fashion, entertainment, excitement, healthy, youth, technology, family, happiness, hunger, strong, protection, injury, desire, delicious, art, humor, freedom, refreshing, happy, pain, clean, style, cool, comfort, vacation, luxury, sex appeal, variety, freshness, unique, hot, smoking, different, fitness, craving, fast, life, quality, active, tough, music, relaxation, sexuality, classic, alcohol, flavorful, sexual, cold, wild, innovation, dangerous, harmful, class, christmas, romance, fear, innocence, seduction, light, friendship, tasty, party, change, accident, elegance, athletic, harm, destruction, attraction, flavor, celebration, unhealthy, taste, pollution, wealth, sport, imagination, simplicity, physical abuse, exotic, car, nutrition, creativity, togetherness, powerful, adventurous, flight, sadness, outdoors, lust, choices, beautiful, stylish, rugged, new, animal cruelty, scary, exciting, enjoyment, work, spicy, attractive, old, milk, education, animal abuse, action, clothing, toughness, thirst, indulgence, heat, candy, surprise, smooth, safe, drinking, space, gift, water, time, purity, home, growth, future, dirty, chocolate, care, big, animal, individuality, holiday, exercise, drink, color, anger, unity, simple, relax, money, coolness, confidence, broken, success, intelligence, fancy, culture, competition, suicide, heart, coffee, strange, royalty, peace, messy, joy, funny, innovative, domestic violence, determination, creative, odd, beer, sweet, pure, performance, flying, fantasy, exploration, diversity, damage, satisfaction, history, childhood, awareness, war, size, play, mystery, fire, easy, convenience, control, communication, choice, celebrity, athleticism, winter, support, shoes, fame, break, animals, small, risk, options, help, halloween

## 8. Topics in videos

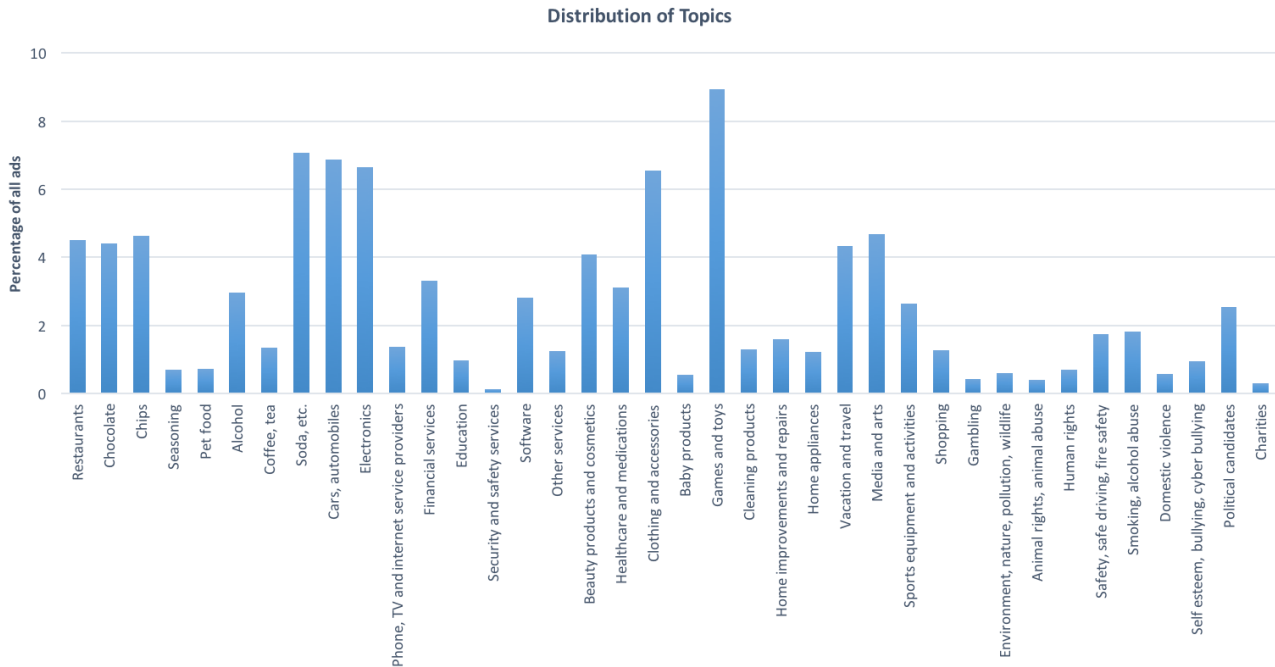

Figure 7. Fraction of each topic out of all ads in the video dataset.

Fig. 7 shows the distribution of topics from our video dataset. Each video was annotated by 5 MTurkers and we picked the most frequently selected topic as the annotation for the video. If there was a tie, we randomly selected one annotation.

From the topic distribution, we can tell that “games and toys” contains the most videos in our dataset, and the number (8.9%) is much higher than that in the image dataset (0.95%). The reason is that videos are more appropriate for advertising computer or mobile phone games, since the graphics and the game experience can hardly be expressed in static images. A similar trend is also observed in topics such like “political candidates” and “healthcare and medications”, and the reason is that themes in these ads are relatively complicated (political views, benefits of medical system, etc.) thus video ads demonstrate more advantages in delivering such messages due to the extended time and space. We also observed that many ads in our video dataset are in “Clothing and accessories”, “Cars, automobiles”, and “Beauty products and cosmetics”, which agrees with what we have seen in our image ads dataset.

## 9. Sentiments in videos

Fig. 8 shows the distribution of several representative topics over common sentiments. Each video is assigned to 5 different MTurkers and they can choose multiple sentiments for each video. We picked the most frequent sentiment as the one for the video. If there is a tie, a random sentiment from the most frequent candidates is chosen. In this figure we show the most frequent sentiments in all topics as well as the topics containing most diverse sentiments. Therefore the selected topics and sentiments differ a little bit from the image dataset.

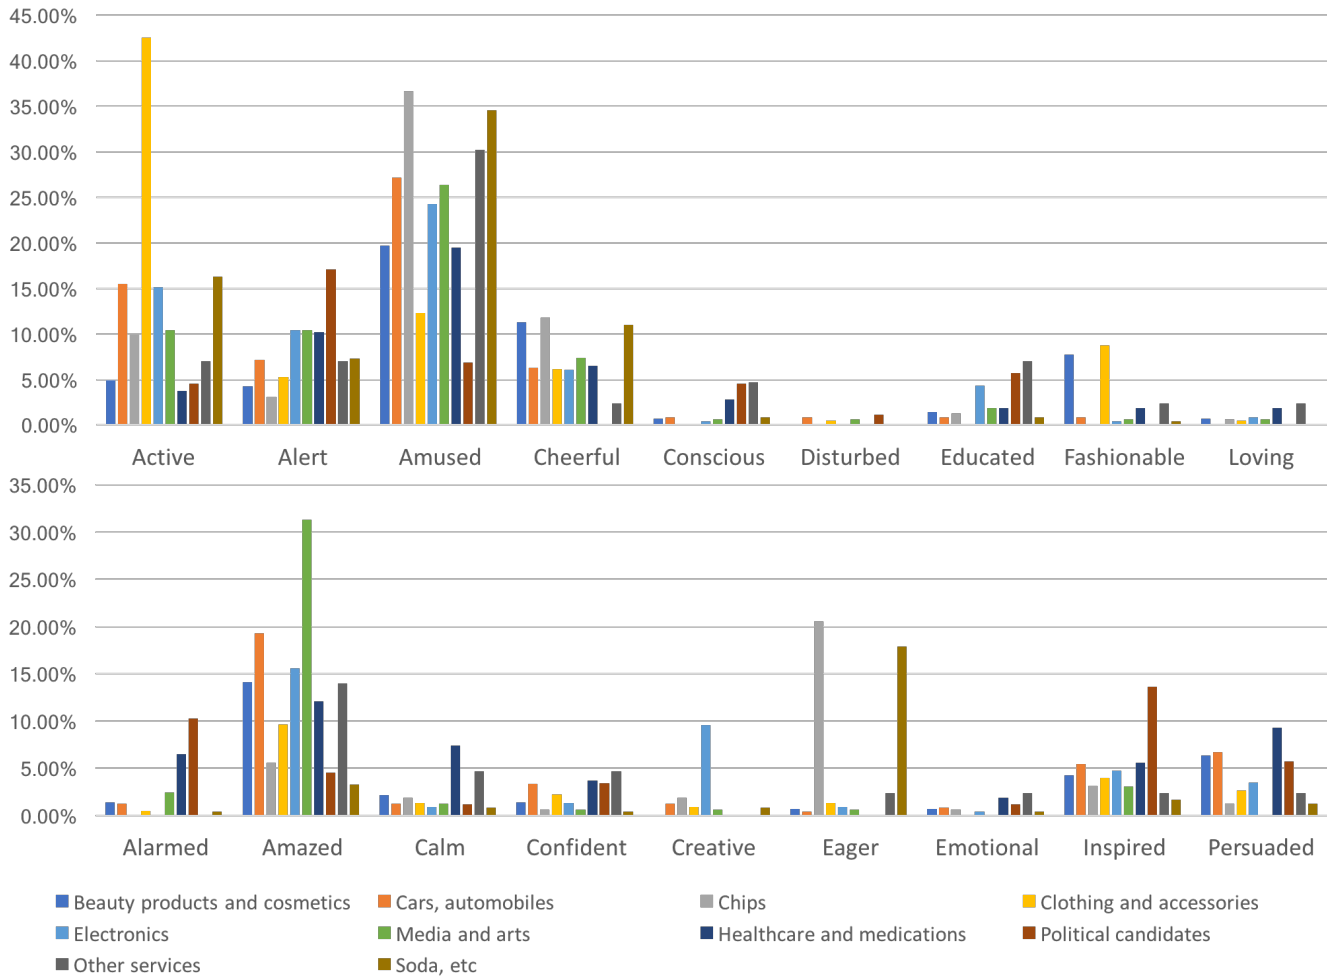

Figure 8. Distribution of several representative topics over common sentiments in the video dataset.

From the figure we observe some interesting trends. “Amused” is a very common sentiment in ads covering a variety of topics, but in “Political candidates” it is rarely used. The reason is likely that ads treat political issues in serious fashion. However, in the image dataset, not many ads try to spread “Amused” sentiments. We believe the reason can be attributed to the limited space in static images. This observation also verifies our assumption that using humor and excitements as hints might be very helpful in understanding video ads.

In “Clothing and accessories”, “Active” is more frequently used because many clothing brands targeted for teenagers are promoting their energetic and adventurous life styles. We also observe that “Eager” is most related to food or drink ad topics, such as “Chips” and “Soda”. This observation agrees with our daily experience that most food ads are trying to make the audience feel hungry and thirsty. Another example is the feeling of “Fashionable”, as both image ads and video ads about “Beauty products” and “Clothing and accessories” are trying to deliver such sentiment.

## 10. Inter-annotator agreement in videos

In Fig. 9 we show some statistics about the inter-annotator agreement over topic and sentiment annotations in video. For this figure we only analyzed the annotations for the 2,528 videos where we ask annotators to choose among provided options (rather than write free-form text). We exclude low-quality videos where people cannot find a meaningful topic. From the left chart in Fig. 9 we can see that on 88% of videos, at least 3 of 5 annotators agree on the topic, which is reliable agreement.

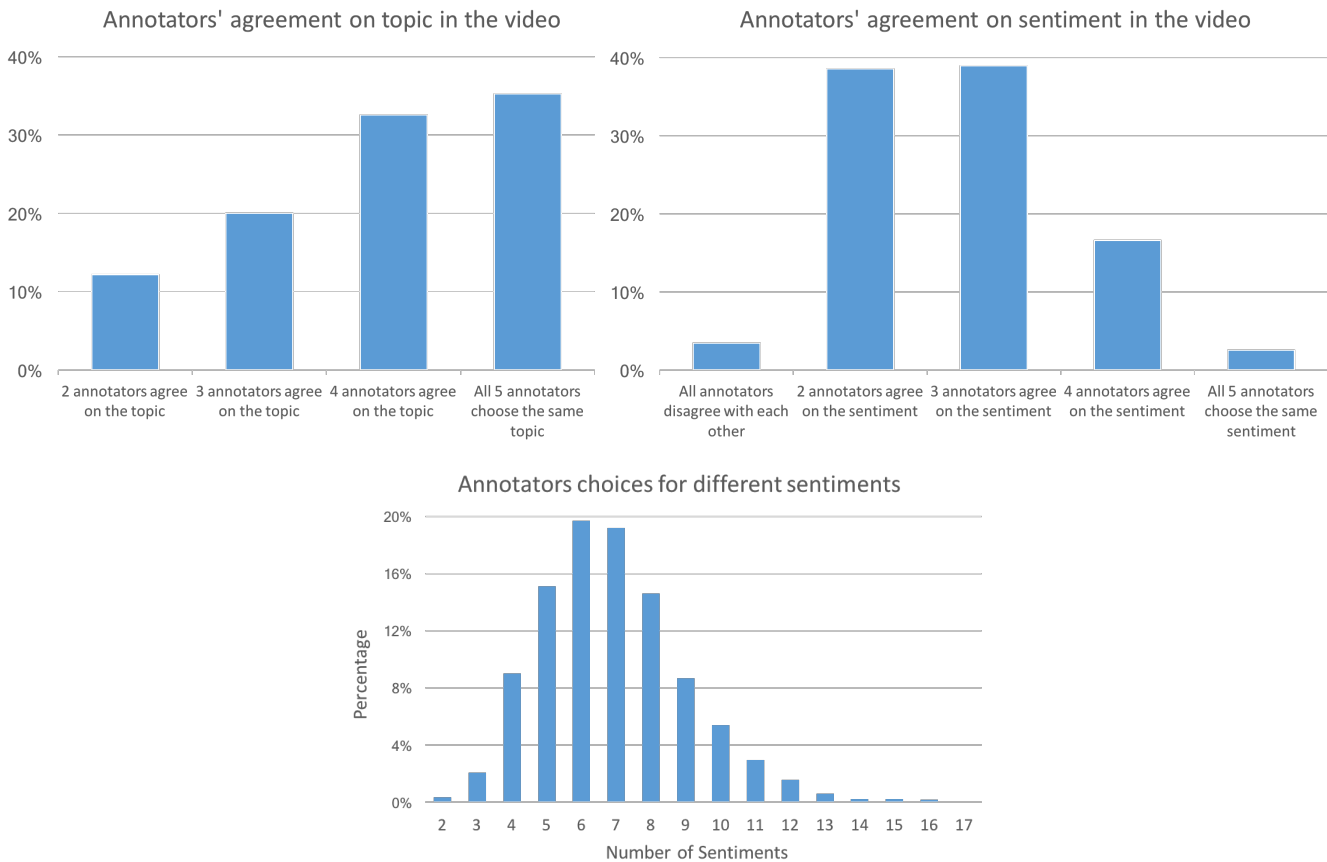

Figure 9. Inter-annotator agreement on topic and sentiment in videos.

In contrast, annotating sentiment is more ambiguous. From the right chart, we notice that annotators have more diverse opinions on sentiments within videos. Specifically, only in 3% do all 5 annotators agree on the sentiments being delivered. However it is also uncommon (3%) that people all disagree on the sentiment in a video. Recall that annotators can mark multiple sentiments per video, hence agreement is harder to accomplish. To gain further insight into the sentiment annotations, in the bottom chart in Fig. 9 we show the unique number of sentiments marked per video. Since every video is assigned to 5 annotators and every annotator can choose multiple sentiments, there can be a large number of unique marked statements. The smaller the number, the more agreement the annotators have on the video's understanding. Nearly 40% videos deliver 6 to 7 different sentiments to their audiences, and over 90% videos contain less than 10 sentiments.



## **11. Question-answer examples in videos**

Tab. 2 shows the common words occurring in response to the “What should I do” and “Why should I do it” questions for each topic in the video dataset.

When comparing the results from video dataset and image dataset, we notice that the top 5 common words are extremely similar for the same topics. This makes sense if we consider that the goal for image ads and video ads are all the same (promoting products or services in viewers), thus it is not surprising that people have similar responses to these questions. We also notice that a large part of the words in the table are verbs and the topic word itself appears frequently in the responses.



| Restaurants, etc. |              | Chocolate, etc. |            | Chips, etc.       |           | Ketchup, etc.     |           | Pet food             |             |
|-------------------|--------------|-----------------|------------|-------------------|-----------|-------------------|-----------|----------------------|-------------|
| What?             | Why?         | What?           | Why?       | What?             | Why?      | What?             | Why?      | What?                | Why?        |
| eat               | food         | buy             | good       | buy               | good      | buy               | make      | buy                  | dog         |
| buy               | good         | eat             | make       | eat               | make      | use               | taste     | food                 | cats        |
| restaurant        | eat          | candy           | taste      | gum               | eat       | product           | good      | dog                  | love        |
| food              | burger       | chocolate       | chocolate  | chips             | delicious | food              | food      | cat                  | food        |
| fast              | delicious    | bar             | eat        | chew              | taste     | sauce             | use       | pet                  | pet         |
| Coffee, tea       |              | Soda, etc       |            | Cars              |           | Electronics       |           | Phone, TV, etc.      |             |
| What?             | Why?         | What?           | Why?       | What?             | Why?      | What?             | Why?      | What?                | Why?        |
| coffee            | coffee       | drink           | drink      | buy               | car       | buy               | phone     | service              | service     |
| buy               | make         | buy             | make       | car               | drive     | phone             | features  | use                  | offer       |
| drink             | drink        | soda            | good       | insurance         | good      | use               | take      | phone                | internet    |
| tea               | good         | milk            | refreshing | purchase          | vehicle   | camera            | use       | buy                  | phone       |
| use               | help         | product         | give       | get               | get       | get               | pictures  | internet             | fast        |
| Security services |              | Software        |            | Beauty products   |           | Healthcare        |           | Clothing             |             |
| What?             | Why?         | What?           | Why?       | What?             | Why?      | What?             | Why?      | What?                | Why?        |
| buy               | home         | use             | help       | buy               | make      | buy               | help      | buy                  | make        |
| insurance         | check        | service         | use        | product           | look      | use               | health    | shoes                | wear        |
| system            | use          | app             | make       | use               | beautiful | get               | care      | clothing             | help        |
| blink             | easy         | website         | business   | purchase          | skin      | condoms           | need      | wear                 | clothes     |
| home              | dangerous    | buy             | easy       | beauty            | hair      | health            | effective | brand                | shoes       |
| Baby products     |              | Games and toys  |            | Cleaning products |           | Home improvements |           | Home appliances      |             |
| What?             | Why?         | What?           | Why?       | What?             | Why?      | What?             | Why?      | What?                | Why?        |
| buy               | baby         | game            | game       | buy               | clean     | buy               | home      | buy                  | make        |
| diapers           | parents      | buy             | fun        | use               | clothes   | home              | sleep     | use                  | use         |
| baby              | diapers      | play            | play       | product           | stains    | use               | make      | purchase             | clean       |
| product           | keep         | video           | exciting   | detergent         | effective | furniture         | products  | water                | cooking     |
| cup               | make         | download        | like       | laundry           | make      | store             | help      | machine              | food        |
| Media and arts    |              | Sports          |            | Shopping          |           | Gambling          |           | Environment          |             |
| What?             | Why?         | What?           | Why?       | What?             | Why?      | What?             | Why?      | What?                | Why?        |
| watch             | show         | buy             | help       | shop              | business  | lottery           | money     | buy                  | environment |
| show              | entertaining | sports          | sports     | store             | need      | play              | win       | stop                 | destroy     |
| movie             | fun          | product         | make       | buy               | offer     | tickets           | back      | use                  | help        |
| buy               | funny        | watch           | active     | use               | shopping  | buy               | get       | support              | energy      |
| see               | movie        | brand           | play       | retail            | retail    | gambling          | tickets   | polluting            | polluting   |
| Human rights      |              | Safety          |            | Domestic violence |           | Self esteem       |           | Political candidates |             |
| What?             | Why?         | What?           | Why?       | What?             | Why?      | What?             | Why?      | What?                | Why?        |
| support           | right        | drive           | accident   | violence          | violence  | bullying          | bullying  | vote                 | candidate   |
| rights            | help         | safe            | life       | domestic          | domestic  | stop              | hurt      | candidate            | people      |
| women             | women        | drink           | save       | abuse             | help      | cyber             | help      | support              | voting      |
| marriage          | want         | speed           | drive      | stop              | stop      | watch             | stop      | bernie               | make        |
| equality          | world        | safety          | kill       | help              | abuse     | stand             | people    | sanders              | work        |
| Alcohol           |              | Financial       |            | Animal Rights     |           | Other Services    |           | Smoking              |             |
| What?             | Why?         | What?           | Why?       | What?             | Why?      | What?             | Why?      | What?                | Why?        |
| buy               | drink        | use             | help       | adopt             | animals   | use               | help      | smoking              | smoking     |
| beer              | beer         | bank            | money      | animals           | need      | service           | get       | stop                 | bad         |
| drink             | good         | service         | make       | pet               | help      | company           | make      | drink                | health      |
| alcohol           | make         | invest          | investing  | dog               | home      | get               | use       | drugs                | kill        |
| brand             | taste        | card            | use        | shelter           | make      | website           | business  | quit                 | life        |

Table 2. Common words in responses to “What should I do, according to the ad?” and “Why, according to the ad, should I do it?” questions for the video dataset.

## 12. Funny/exciting annotations in videos

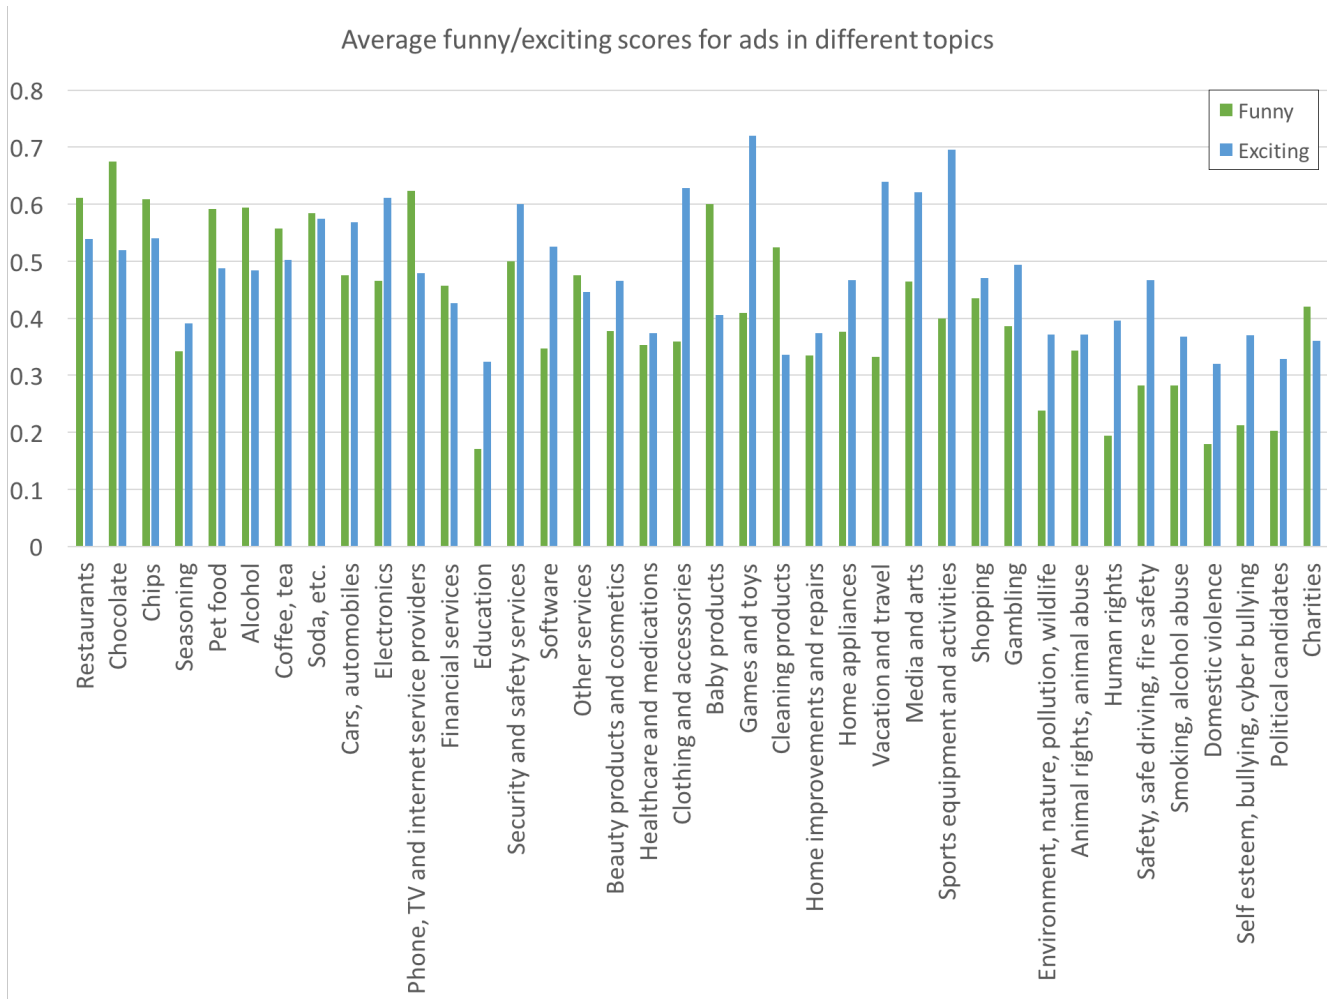

Figure 10. Average funny/exciting scores for ads in different topics.

Fig. 10 shows the average funniness and excitement scores for each topic in our video dataset. Specifically, we considered an annotator’s choice of “funny” or “exciting” as a score of 1, and “not funny” or “not exciting” as 0, then averaged all annotations within a topic to obtain the score for that topic. From Fig. 10 we can tell that ads in “Games and toys” and “Sports equipment and activities” frequently use exciting elements in their videos. Similarly, food related topics tend to use humor to impress their viewers, as seen in the higher scores in “Chocolate”, “Restaurants”, and “Chips”. We can also tell that in serious topics, such as “Education”, “Domestic violence”, and “Political candidates”, neither funny nor exciting strategies are frequently used as these ads aim to gain trust from their audiences.

### 13. Duration of videos

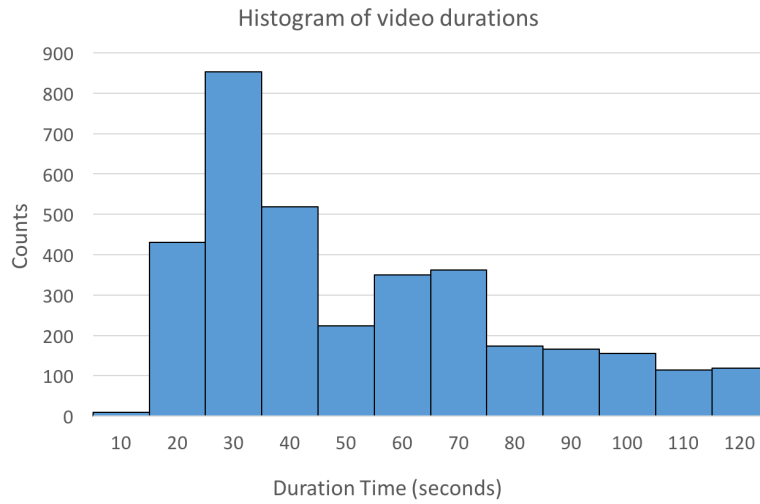

Figure 11. Histogram of video durations.

Fig. 11 shows a histogram of the video durations in our collected dataset. During data collection we excluded all video ads that longer than 120 seconds. The average duration for all 3,477 videos is 49 seconds. Note that nearly one fourth of the ads (24.5%) in our dataset are from 20 seconds to 30 seconds, and 68.6% of all videos are shorter than 1 minute.

## 14. Interface for video ads collection

As shown in Fig. 12, before the MTurkers accept the HITs we provide six sample videos with corresponding answers to each question. To give MTurkers a better understanding of our desired responses, we provide both qualified sample answers as well as unacceptable sample answers. We pick sample videos covering various topics, including cars, games, safety PSA, political campaign ads, etc.

**Here are some samples for you. Please make sure you have watched all the videos and understood all the sample answers before you accept the HIT.**

| Sample 1                                                                                                                                                                                                                                                                                                                                                                                                                                                                                                                                                                                                                                                                                                                                                                                                                                                                                                                                                                                                                                                                                                                                                                                                                                                                                                                                                                                                                                                                                                                                                                             | Sample 2 | Sample 3 | Sample 4 | Sample 5 | Sample 6 |
|--------------------------------------------------------------------------------------------------------------------------------------------------------------------------------------------------------------------------------------------------------------------------------------------------------------------------------------------------------------------------------------------------------------------------------------------------------------------------------------------------------------------------------------------------------------------------------------------------------------------------------------------------------------------------------------------------------------------------------------------------------------------------------------------------------------------------------------------------------------------------------------------------------------------------------------------------------------------------------------------------------------------------------------------------------------------------------------------------------------------------------------------------------------------------------------------------------------------------------------------------------------------------------------------------------------------------------------------------------------------------------------------------------------------------------------------------------------------------------------------------------------------------------------------------------------------------------------|----------|----------|----------|----------|----------|
|                                                                                                                                                                                                                                                                                                                                                                                                                                                                                                                                                                                                                                                                                                                                                                                                                                                                                                                                                                                                                                                                                                                                                                                                                                                                                                                                                                                                                                                                                                                                                                                      |          |          |          |          |          |
| <ul style="list-style-type: none"> <li> <p><b>Is this advertisement in English?</b></p> <p>Acceptable Answer      <b>Yes (English)</b></p> </li> <li> <p><b>Is this advertisement funny?</b></p> <p>Acceptable Answer      <b>Yes</b></p> </li> <li> <p><b>Is this advertisement exciting?</b></p> <p>Acceptable Answer      <b>No</b></p> </li> <li> <p><b>What is being advertised in this video?</b></p> <p>Acceptable Answer      <b>Cars and Automobiles</b></p> <p>Unacceptable Answer    <b>Subaru</b> (Do not use brand name)</p> <p>                                 <b>Dogs</b></p> <p>                                 <b>Cellphones</b></p> </li> <li> <p><b>What emotions is the video aiming to make the viewers experience?</b></p> <p>Acceptable Answer      <b>Delighted</b></p> <p>                                 <b>Excited</b></p> <p>Unacceptable Answer    <b>Sympathetic</b></p> </li> <li> <p><b>What does the video try to persuade the viewers to do?</b></p> <p>Acceptable Answer      <b>Buy this car</b></p> <p>Unacceptable Answer    <b>Adopt a dog</b></p> </li> <li> <p><b>According to the video, why should the viewers do this?</b></p> <p>Acceptable Answer      <b>Because it is pet-friendly.</b></p> <p>                                 <b>Because I can drive with my dogs in this car.</b></p> <p>Unacceptable Answer    <b>Because it is good/funny.</b> (Not specific to this video)</p> <p>                                 <b>Because my dogs can drive this car for me.</b> (Incorrect understanding of the video)</p> </li> </ul> |          |          |          |          |          |

Figure 12. We show MTurkers six sample videos as well as both acceptable and unacceptable answers for these sample videos.

Fig. 13 demonstrates how our HIT interface evolved. In early stage questionnaires we ask MTurkers to write free-form responses to answer the questions about the video. After we collected enough responses, we compiled a representative list for common topics (and sentiments as well) in video advertisements. In later HITs MTurkers just needed to mark the options from our list. If they felt that the video did not belong to any existing options, they could write a free-form response.

Early-stage free-form questionnaire:

**3. What is being advertised in this video?**

**4. How do you feel after watching this advertisement? In other words, what emotions the video is aiming to make you experience?**

Please use a few words or phrases to describe your feelings. Please do NOT write a full sentence for this question.

We understand that same video can provoke different feelings in different viewers, but there are some feelings that are extremely unlikely (e.g. negative feelings for an happy video).

**Please answer this question from a general viewer's perspective and do NOT treat this question as a subjective opinion survey.**

Multiple choice selections questionnaire:

**5. What is being advertised in this video?**

If the product being advertised belongs to one of the categories listed below, please **just mark the option**. Otherwise, you can write your own answer.

- Restaurants, Cafe, Fast food**
- Chips, Snacks, Nuts, Fruit, Gum, Cereal, Yoghurt, Soups**  
general food should also be put in this category
- Pet food**
- Coffee, Tea**
- Sports equipment and Activities**
- Phone, TV and Internet service providers**
- Education**  
universities, colleges, kindergartens, online degrees, etc.
- Baby products**  
baby food, sippy cups, diapers, etc.
- Games and toys**  
video games, mobile games, etc.
- Shopping**  
department stores, drug stores, groceries, etc.
- Beauty products and cosmetics**  
deodorant, toothpaste, makeup, hair product, laser hair removal, etc.
- Clothing and accessories**  
jeans, shoes, eye glasses, handbags, watches, jewelry, etc.
- Vacation and travel**  
airlines, cruises, theme parks, hotels, travel agents, etc.
- Home improvements and repairs**  
furniture, decoration, lawn care, plumbing, etc.
- Software**  
Internet radio, streaming, job search website, grammar correction apps, travel planning, etc.
- Political candidates** (support or opposition)
- Animal rights, Animal abuse**
- Safety, Safe driving, Fire safety**
- Domestic violence**
- Charities**
- Write my own:**
- Chocolate, Cookies, Candy, Ice cream**
- Seasoning, Condiments, Ketchup**
- Soda, Juice, Milk, Water, Energy drinks**
- Alcoholic drinks**  
vodka, rum, beer, etc.
- Electronics**  
computers, laptops, tablets, cellphones, TVs, etc.
- Financial services**  
banks, credit cards, investment firms, etc.
- Security and safety related products**  
anti-theft, safety courses, etc.
- Other services**  
dating, tax, legal, loan, religious, printing, catering, etc.
- Gambling**  
lotteries, casinos, etc.
- Media and arts**  
TV shows, movies, musicals, books, audio books, etc.
- Healthcare and medications**  
hospitals, health insurance, allergy, cold remedy, home tests, vitamins, etc.
- Cars and automobiles**  
car sales, auto parts, car insurance, car repair, gas, motor oils, etc.
- Cleaning products**  
detergents, fabric softeners, soap, tissues, paper towels, etc.
- Home appliances**  
coffee makers, dishwashers, cookware, vacuum cleaners, heaters, music players, etc.
- Environment, Nature, Pollution, Wildlife**
- Human rights**  
including rights for minorities, women's rights and LGBT rights
- Smoking, Alcohol abuse, Drug abuse**  
PSAs relating anti-smoking, drug prevention etc.
- Self esteem, Bullying, Cyber bullying**

Figure 13. We first collect free-form answers for topics and sentiments questions, and in the later HITs MTurkers just need to choose from the list we compiled.

## 15. Symbolism prediction model

In Sec. 6.2 of the main text, we use an attention network to determine what symbols are present in an image. Here we include details about this network.

We use 224x224 input images and build both an attention predictor and a feature extractor on top of the feature map from a pre-trained ResNet-50 model. Each 7x7 attention output indicates the probability that the associated region contributes to the final representation. Accordingly, each 7x7 feature extractor output denotes a feature vector associated with the same region. The final representation is a weighted average over the image features using the predicted attention distribution. We use sigmoid cross entropy as our loss function. We include the architecture for the network in Fig. 14. The network achieves F-score of 15.79%.

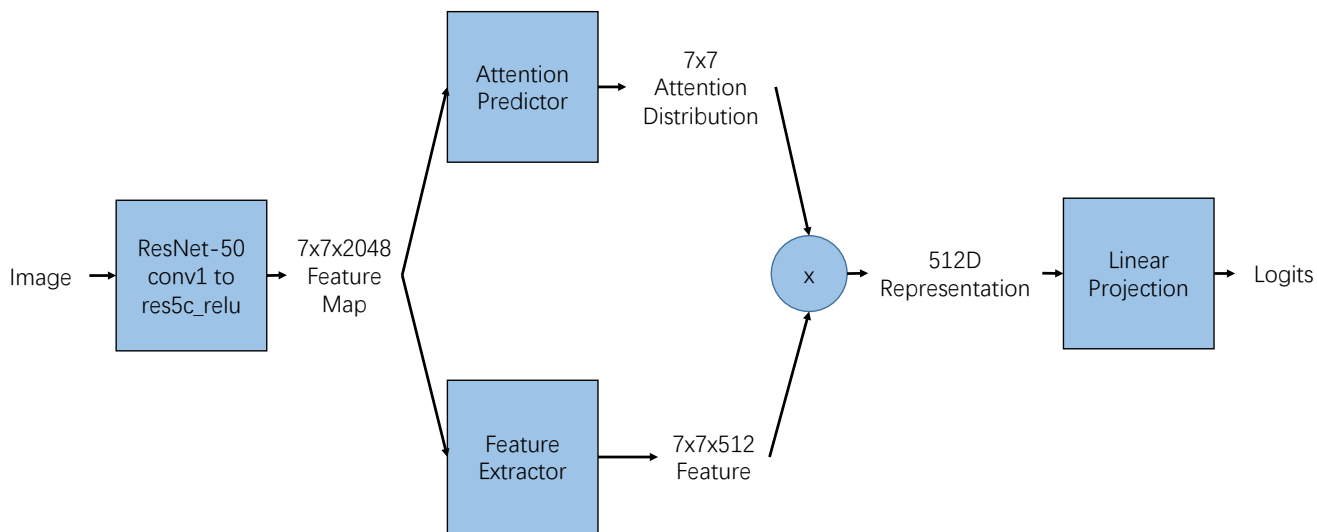

Figure 14. The topology of the attention network for predicting symbols. The feature extractor is constructed by two 1x1x1 convolutional layers which output 512D feature. We add batch normalization layer after each convolutional layer and we add dropout layer while training. The attention predictor has the same architecture except that an extra linear projection layer mapping 512D feature to 1D is added, and softmax activation is applied on the final  $7 \times 7$  output.

In a subsequent experiment, we attempted to improve symbolism prediction by narrowing down our list of symbols to a shorter list of more distinct and reliable symbols. We cluster symbols based on co-occurrence relations, and we measure the similarity between symbols in the following way. We define the similarity between symbols  $s_i$  and  $s_j$  to be  $Sim(s_i, s_j) = \max(P(s_i|s_j), P(s_j|s_i))$ , where  $P(s_i|s_j)$  denotes the probability that we observe the presence of symbol  $i$  given the presence of symbol  $j$ . Given the similarity matrix, we use agglomerative clustering to cluster symbols, and define the similarity between two clusters  $c_i$  and  $c_j$  to be  $Sim(c_i, c_j) = \min\{Sim(x, y) : x \in c_i, y \in c_j\}$ . During the clustering process, clusters with similarity greater than or equal to 10% are merged. Finally, we keep clusters that contain more than 200 images to ensure a large enough amount of training data for each cluster. This gives us 53 final clusters. A model trained to distinguish between these 53 symbols achieves 26.84% F-score.

Figure 15 shows examples of some of the data we collected for each symbol (where annotations are grouped into the 53 symbol categories). Note the significant diversity within each cluster.



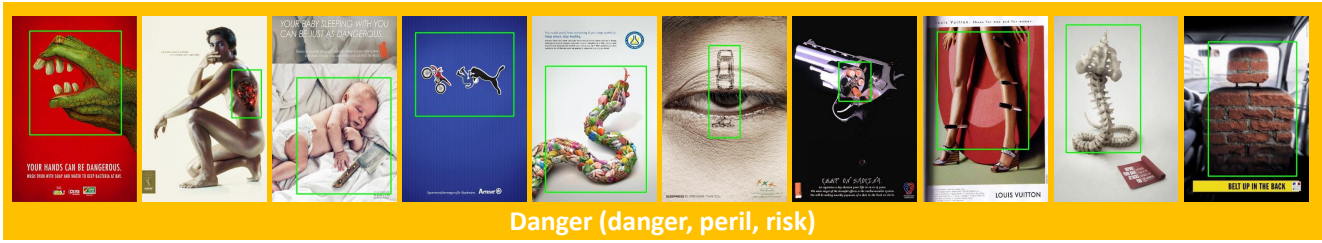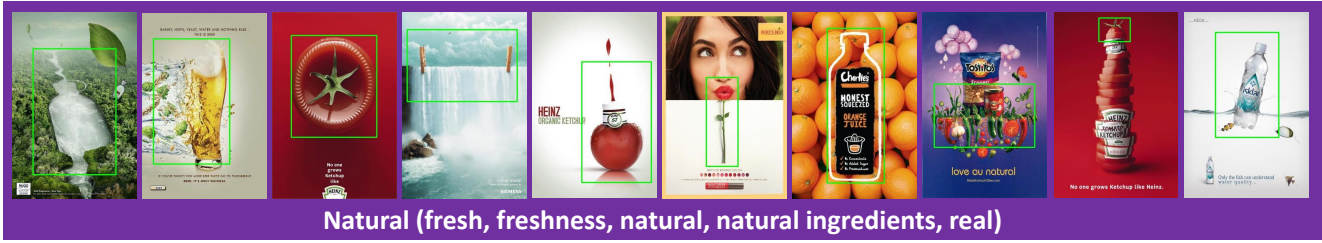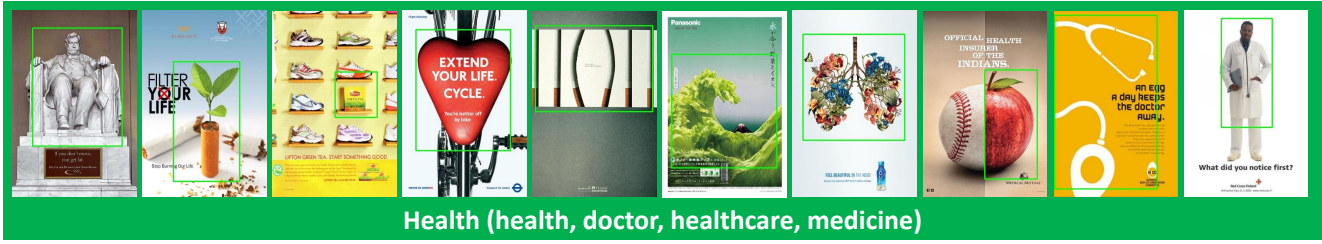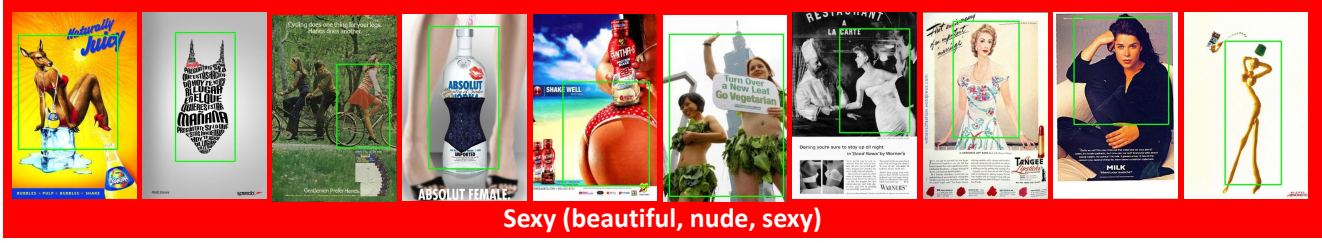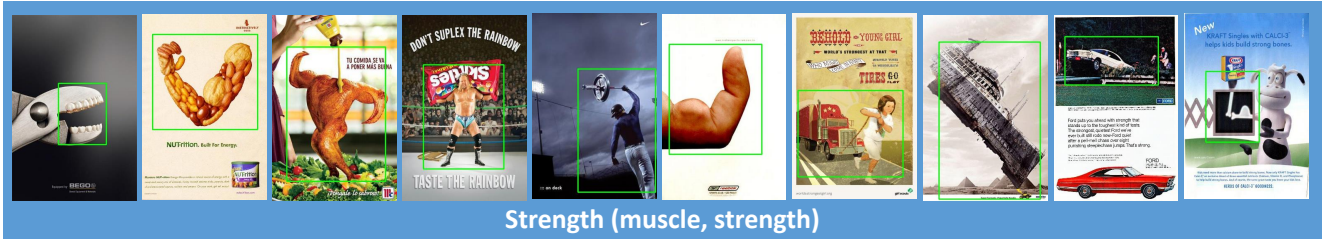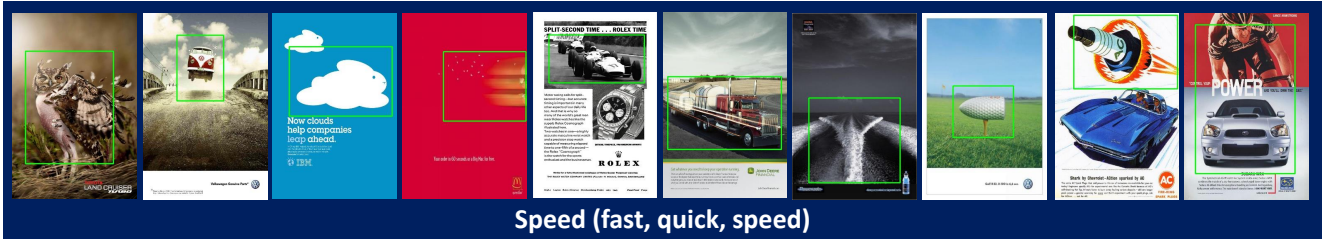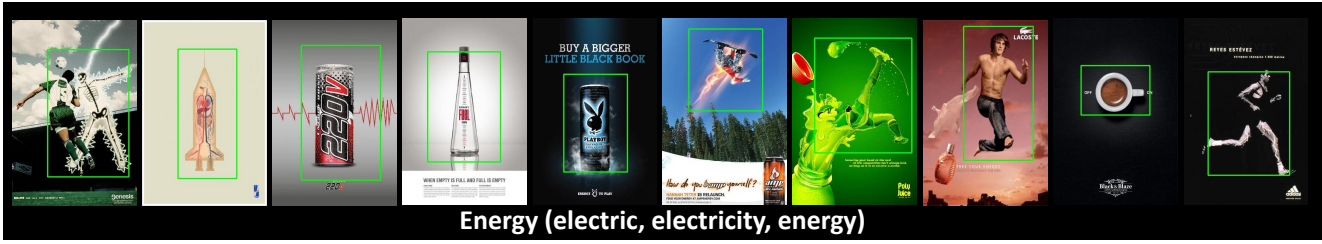

Figure 15. Examples of symbolism labels and bounding boxes from our annotators.



## 16. Examples of question-answering results and detected symbols

Fig. 17 shows some examples of question-answering results by the baseline and our method capturing symbolism. We measure accuracy as whether the machine-given answer agrees with any of the human-given answers. We also show the symbols detected by our symbol classifier. We show the image, the question selected based on TFIDF, and the ground-truth answers. We show the response from both our method and the baseline.

In (a), we see that while both methods' answers are reasonable, they both disagree with the human-given responses. In (b), we see that our method which can predict what visual content symbolizes "sexiness," can give the right answer, while the baseline gives a reasonable but technically incorrect answer. In (c), we successfully predict "refreshing" as a symbol, but the baseline also correctly outputs that answer. In (d), the baseline is correct and our method is not, but note that "kills" might be a more correct response to "Why should I not buy products made from animals," compared to the given answers. In (e), our system fails to predict "French" as a symbol. In (f), our method likely predicts "taste" because the symbol classifier misinterprets the objects in the image as bowls rather than candles.

In Fig. 16, we see responses for the video question-answering task. In this figure, we show the top-5 responses from the system, with confidence. The second-to-last column shows the ground-truth answers. We see that in (b), the system interprets the visual cues correctly (e.g. "weather"), but fails to capture the rhetoric of the system. Similarly in (c), it correctly detects nature, but fails to put that in context. In (f), the system produces the correct answer likely because it successfully detected the first frame as a "home".

|     | Video frames                                                                        | One question and answer                                                                                                                             | GT single-word answers                   | Predicted answers                                                                         |
|-----|-------------------------------------------------------------------------------------|-----------------------------------------------------------------------------------------------------------------------------------------------------|------------------------------------------|-------------------------------------------------------------------------------------------|
| (a) |    | Q: why should you have a cup of soup .<br>A: because it is delicious and makes a quick lunch or meal                                                | sandwiches<br>lunch<br>sandwich<br>moves | cats:0.1177<br>delicious:0.1114<br>make:0.1024<br>tasty:0.0801<br>creative:0.0661         |
| (b) |   | Q: why should you i should follow the australian government .<br>A: because aids can kill you .                                                     | save<br>kill<br>associate                | weather:0.1907<br>dangerous:0.1693<br>best:0.0849<br>warm:0.0744<br>diverse:0.0653        |
| (c) |  | Q: why should you visit colorado .<br>A: because there is a lot to do there .                                                                       | life<br>alive<br>lot<br>waiting<br>style | environment:0.1351<br>nature:0.1036<br>vacation:0.0592<br>adventures:0.0527<br>gas:0.0497 |
| (d) |  | Q: why should you download and play the game shown in the ad<br>A: because it has neat designs and exciting music to suggest it is a fun experience | fun<br>exciting                          | fun:0.6555<br>action:0.6305<br>game:0.4171<br>fight:0.3830<br>exciting:0.3037             |
| (e) |  | Q: why should you do n't smoke .<br>A: because it will kill you .                                                                                   | body<br>kill<br>problems                 | safe:0.3272<br>kill:0.3055<br>health:0.1971<br>could:0.1430<br>bad:0.1258                 |
| (f) |  | Q: why should you adopt a cat from a shelter .<br>A: because loving the animals gives a way of taking care                                          | need<br>home<br>animals<br>pets          | home:0.4071<br>faster:0.2473<br>pets:0.1374<br>stains:0.1362<br>useful:0.1312             |

Figure 16. Predicted answers for video question-answering.

|     | Image                                                                               | Symbols                                                                                                                                                                            | Question                                           | GT-Answers                                       | QA-Baseline | QA+Symbols |
|-----|-------------------------------------------------------------------------------------|------------------------------------------------------------------------------------------------------------------------------------------------------------------------------------|----------------------------------------------------|--------------------------------------------------|-------------|------------|
| (a) |    | beauty:0.5956<br>violence:0.1103<br>youth:0.0972<br>desire:0.0745<br>celebrity:0.0727<br>sexy:0.0719<br>abuse:0.0657<br>sex:0.0629<br>fame:0.0601<br>physical abuse:0.0562         | Why should I buy Maybelline Rocket Volume mascara? | lashes<br>short<br>brush<br>volume<br>voluminous | attractive  | attractive |
| (b) |    | sex:0.6208<br>beauty:0.6054<br>sexy:0.4231<br>sex appeal:0.2933<br>seduction:0.2327<br>desire:0.2305<br>lust:0.1645<br>sexuality:0.1441<br>sexual:0.1256<br>fashion:0.0819         | Why should I wear Vera Wang Perfume?               | attractive<br>beautiful<br>sexy<br>feel<br>sexy  | smell       | sexy       |
| (c) |    | refreshing:0.1719<br>alcohol:0.1151<br>health:0.1076<br>sports:0.0742<br>danger:0.0720<br>cold:0.0662<br>thirst:0.0654<br>energy:0.0560<br>cool:0.0516<br>death:0.0496             | Why should I buy this brand of beer?               | refreshing<br>feeling<br>refreshing              | refreshing  | refreshing |
| (d) |  | death:0.2833<br>animal abuse:0.2755<br>danger:0.2303<br>abuse:0.1852<br>animals:0.1827<br>violence:0.1326<br>animal:0.1306<br>nature:0.1074<br>strong:0.1008<br>environment:0.0981 | Why should I not buy products made from animals?   | hurts<br>dangerous<br>bloody                     | dangerous   | kills      |
| (e) |  | fresh:0.1829<br>food:0.1601<br>hunger:0.1377<br>flavorful:0.0974<br>freshness:0.0877<br>natural:0.0840<br>delicious:0.0588<br>fun:0.0553<br>healthy:0.0545<br>craving:0.0512       | Why should I eat this Burger King Fondue burger?   | different<br>politics<br>french                  | delicious   | delicious  |
| (f) |  | fresh:0.4897<br>flavorful:0.3733<br>hot:0.3649<br>food:0.2781<br>freshness:0.2522<br>spicy:0.2360<br>delicious:0.2173<br>hunger:0.1925<br>healthy:0.1822<br>tasty:0.1805           | Why should I celebrate Diwali?                     | wished<br>entertaining                           | fun         | taste      |

Figure 17. Predicted symbols and answers for image question-answering.

## 17. Full-sentence question-answering

Finally, we show an additional quantitative result. Rather than predict a single word out of a vocabulary of 1000 words, or an answer cluster ID out of 30 clusters, here we train a network to predict full-sentence answers for the “Why should I do [Action] according to the ad?” question. We compare a baseline against a method which uses supervision from our topic, sentiment, and symbol annotations, using a variety of machine translation metrics. The baseline uses a 128-dimensional encoding of the question, and a 2048-dimensional encoding of the image (obtained from a Residual Network trained on the ILSVRC2015 1000 classes). Our method replaces this image encoding with a concatenation of three 512-dimensional encodings. These come from a network that fine-tunes the ResNet using three branches, each of which learns to distinguish between our 38 products, 30 sentiments, and 53 symbols, respectively. Both methods then train an LSTM network to generate full-sentence answers to the question, using beam size 1 (other beam sizes produced similar results). The results from both networks are shown in Table 3 below. We see that for most metrics our symbolism-aware method achieves an improvement over the baseline.

| Metric | Baseline | Ours   |
|--------|----------|--------|
| CIDEr  | 0.2025   | 0.2207 |
| ROUGE  | 0.4403   | 0.4498 |
| METEOR | 0.2148   | 0.2158 |
| BLEU-4 | 0.2032   | 0.1945 |
| BLEU-3 | 0.2684   | 0.2700 |
| BLEU-2 | 0.3542   | 0.3623 |
| BLEU-1 | 0.4518   | 0.4639 |

Table 3. Full-sentence prediction results using a baseline and a method using an image representation based on symbols, topics, and sentiments.
